# Supplementary material for: Surveillance of medication use: early identification of poor adherence
Source: PubMed Central journal article supplement — J Am Med Inform Assoc. 2011 Nov 19;19(4):649–54. doi: 10.1136/amiajnl-2011-000416 (PMC3384104; doi:10.1136/amiajnl-2011-000416), 2011-11-19
Supplement: amiajnl-2011-000416-s1.pdf [file amiajnl-2011-000416-s1.pdf]

## Appendices

Table A1 – Drug names included in each drug class.

| Antihyperlipidemics   |                       | Antihypertensives   |                       | Oral Hypoglycemics   |                       |                |         |
|-----------------------|-----------------------|---------------------|-----------------------|----------------------|-----------------------|----------------|---------|
| <i>Drug Name</i>      | <i>Drug Era Count</i> | <i>Drug Name</i>    | <i>Drug Era Count</i> | <i>Drug Name</i>     | <i>Drug Era Count</i> |                |         |
| atorvastatin          | 730,358               | furosemide          | 572,738               | isradipine           | 13,582                | metformin      | 306,584 |
| simvastatin           | 406,946               | metoprolol          | 528,540               | bisoprolol           | 13,491                | glipiZIDE      | 136,665 |
| pravastatin           | 187,046               | hydrochlorothiazide | 518,317               | chlorthalidone       | 12,472                | pioglitazone   | 112,860 |
| ezetimibe             | 147,903               | lisinopril          | 485,643               | guanfacine           | 10,591                | rosiglitazone  | 111,689 |
| ezetimibe-simvastatin | 121,567               | amlodipine          | 431,429               | methyldopa           | 10,440                | glyBURIDE      | 104,288 |
| fenofibrate           | 117,990               | atenolol            | 370,273               | perindopril          | 9,469                 | glimepiride    | 80,947  |
| rosuvastatin          | 116,064               | tamsulosin          | 195,000               | prazosin             | 7,685                 | troglitazone   | 24,000  |
| niacin                | 82,416                | valsartan           | 155,561               | methazolamide        | 6,268                 | repaglinide    | 22,523  |
| gemfibrozil           | 76,764                | ramipril            | 151,767               | eprosartan           | 5,034                 | nateglinide    | 17,233  |
| lovastatin            | 76,447                | enalapril           | 143,786               | pindolol             | 4,460                 | acarbose       | 8,404   |
| fluvastatin           | 61,212                | losartan            | 142,726               | eplerenone           | 3,076                 | miglitol       | 3,612   |
| cholestyramine        | 55,886                | clonidine           | 136,302               | amiloride            | 2,859                 | chlorproPAMIDE | 2,778   |
| cerivastatin          | 39,555                | spironolactone      | 122,467               | chlorothiazide       | 2,679                 | sitagliptin    | 2,771   |
| colesevelam           | 28,015                | NIFEdipine          | 113,116               | niCARDipine          | 2,588                 | TOLAZamide     | 889     |
| lovastatin-niacin     | 15,724                | doxazosin           | 102,922               | triamterene          | 2,452                 | TOLBUTamide    | 733     |
| colestipol            | 12,911                | quinapril           | 102,435               | betaxolol            | 2,136                 | acetoHEXAMIDE  | 77      |
| clofibrate            | 74                    | carvedilol          | 92,575                | reserpine            | 1,751                 |                |         |
|                       |                       | irbesartan          | 85,385                | methylothiazide      | 1,744                 |                |         |
|                       |                       | terazosin           | 80,071                | ethacrynic acid      | 1,617                 |                |         |
|                       |                       | metolazone          | 61,949                | timolol              | 1,364                 |                |         |
|                       |                       | benazepril          | 61,793                | guanabenz            | 719                   |                |         |
|                       |                       | olmesartan          | 55,290                | penbutolol           | 555                   |                |         |
|                       |                       | toremide            | 54,150                | nimodipine           | 503                   |                |         |
|                       |                       | fosinopril          | 49,268                | trichlormethiazide   | 324                   |                |         |
|                       |                       | candesartan         | 43,890                | bepidil              | 189                   |                |         |
|                       |                       | captopril           | 41,878                | guanadrel            | 124                   |                |         |
|                       |                       | bumetanide          | 40,826                | bendroflumethiazide  | 117                   |                |         |
|                       |                       | indapamide          | 35,696                | mecamylamine         | 85                    |                |         |
|                       |                       | felodipine          | 31,225                | guanethidine         | 80                    |                |         |
|                       |                       | acetaZOLAMIDE       | 30,437                | dichlorphenamide     | 70                    |                |         |
|                       |                       | labetalol           | 27,711                | mannitol             | 61                    |                |         |
|                       |                       | telmisartan         | 26,657                | polythiazide         | 47                    |                |         |
|                       |                       | nadolol             | 23,753                | carteolol            | 40                    |                |         |
|                       |                       | alfuzosin           | 19,533                | hydroflumethiazide   | 21                    |                |         |
|                       |                       | trandolapril        | 17,038                | urea                 | 6                     |                |         |
|                       |                       | moexipril           | 15,374                | mibefradil           | 2                     |                |         |
|                       |                       | nisoldipine         | 14,951                | rauwolfia serpentina | 2                     |                |         |
